# Supplementary material for: Post-translational modifications of FDA-approved plasma biomarkers in glioblastoma samples
Source: PLoS One. 2017 May 11;12(5):e0177427. doi: 10.1371/journal.pone.0177427 (PMC5426747; doi:10.1371/journal.pone.0177427)
Supplement: S4 Table — (XLSX) [file pone.0177427.s004.xlsx]

## Sheet: Лист1
S4 Table. List of proteins identified by ≥ 3 high quality peptides by Mascot search with possible protein ubiquitination in control
Protein quantitation	Using only features with no protein conflicts
Accession	Peptides	SeqCov(%)	Score	Anova (p)*	Fold	Description	Average Normalised Abundances
							1	2	3	4	5	6	7	8	9	10	11	12
A1AG1_HUMAN	12 (5)	45	1241.04	1.11e-010	10.00	Alpha-1-acid glycoprotein 1 OS=Homo sapiens GN=ORM1 PE=1 SV=1	1.92e+007	2.22e+007	3.47e+006	8.75e+006	3.83e+006	1.34e+007	9.64e+006	2.22e+006	6.04e+006	7.36e+006	7.94e+006	7.88e+006
A1AG2_HUMAN	12 (8)	46	1008.17	1.19e-014	11.56	Alpha-1-acid glycoprotein 2 OS=Homo sapiens GN=ORM2 PE=1 SV=2	2.43e+007	2.14e+007	5.20e+006	1.17e+007	4.16e+006	2.81e+007	2.01e+007	2.43e+006	1.39e+007	1.01e+007	1.25e+007	1.09e+007
A1AT_HUMAN	39 (23)	67	3338.57	5.25e-011	6.89	Alpha-1-antitrypsin OS=Homo sapiens GN=SERPINA1 PE=1 SV=3	3.46e+008	3.47e+008	1.23e+008	2.06e+008	9.55e+007	4.17e+008	3.09e+008	6.05e+007	2.25e+008	2.17e+008	1.96e+008	2.08e+008
A1BG_HUMAN	15 (8)	42	1506.62	4.12e-012	4.98	Alpha-1B-glycoprotein OS=Homo sapiens GN=A1BG PE=1 SV=4	2.01e+007	1.87e+007	5.55e+006	1.90e+007	7.73e+006	2.76e+007	2.26e+007	6.21e+006	1.56e+007	1.50e+007	1.91e+007	1.85e+007
A2AP_HUMAN	20 (15)	52	1275.36	4.50e-009	3.93	Alpha-2-antiplasmin OS=Homo sapiens GN=SERPINF2 PE=1 SV=3	5.29e+006	3.83e+006	2.59e+006	3.00e+006	2.03e+006	7.10e+006	7.65e+006	1.95e+006	5.44e+006	4.66e+006	4.71e+006	4.32e+006
A2GL_HUMAN	12 (9)	43	720.99	3.82e-013	5.17	Leucine-rich alpha-2-glycoprotein OS=Homo sapiens GN=LRG1 PE=1 SV=2	3.15e+006	4.86e+006	1.34e+006	2.41e+006	1.76e+006	5.31e+006	3.10e+006	1.03e+006	2.05e+006	4.35e+006	2.98e+006	2.79e+006
A2MG_HUMAN	89 (62)	72	8860.09	2.58e-011	4.91	Alpha-2-macroglobulin OS=Homo sapiens GN=A2M PE=1 SV=3	5.26e+008	2.14e+008	1.15e+008	2.73e+008	1.07e+008	3.78e+008	4.22e+008	1.09e+008	2.58e+008	2.33e+008	2.09e+008	1.96e+008
AACT_HUMAN	27 (17)	60	2129.80	6.66e-015	6.37	Alpha-1-antichymotrypsin OS=Homo sapiens GN=SERPINA3 PE=1 SV=2	2.80e+007	3.42e+007	6.26e+006	2.01e+007	6.69e+006	2.65e+007	1.98e+007	5.38e+006	1.86e+007	1.93e+007	1.95e+007	1.81e+007
AFAM_HUMAN	29 (25)	50	1864.71	2.28e-012	12.35	Afamin OS=Homo sapiens GN=AFM PE=1 SV=1	2.07e+007	1.79e+007	6.07e+006	1.50e+007	3.95e+006	1.87e+007	2.29e+007	1.85e+006	1.44e+007	9.10e+006	1.47e+007	1.33e+007
ALBU_HUMAN	45 (35)	72	3051.33	2.72e-011	8.88	Serum albumin OS=Homo sapiens GN=ALB PE=1 SV=2	5.24e+007	4.40e+007	1.28e+007	3.79e+007	1.33e+007	6.54e+007	6.31e+007	7.36e+006	2.45e+007	2.47e+007	2.83e+007	2.68e+007
ALS_HUMAN	12 (10)	21	467.23	1.48e-011	30.36	Insulin-like growth factor-binding protein complex acid labile subunit OS=Homo sapiens GN=IGFALS PE=1 SV=1	3.16e+006	1.68e+006	8.54e+005	2.23e+006	1.44e+006	1.21e+007	1.92e+007	6.34e+005	1.67e+006	2.06e+006	1.69e+006	1.84e+006
AMBP_HUMAN	18 (14)	49	1353.26	5.98e-012	12.07	Protein AMBP OS=Homo sapiens GN=AMBP PE=1 SV=1	9.24e+006	9.62e+006	1.81e+006	7.00e+006	1.84e+006	5.33e+006	5.83e+006	7.97e+005	4.71e+006	3.99e+006	5.73e+006	6.21e+006
ANGT_HUMAN	16 (10)	42	1402.92	2.21e-014	3.19	Angiotensinogen OS=Homo sapiens GN=AGT PE=1 SV=1	9.52e+006	7.60e+006	2.98e+006	7.05e+006	5.29e+006	6.31e+006	4.86e+006	3.21e+006	9.40e+006	7.60e+006	8.26e+006	7.35e+006
ANT3_HUMAN	31 (22)	69	2288.85	5.22e-015	5.66	Antithrombin-III OS=Homo sapiens GN=SERPINC1 PE=1 SV=1	2.78e+007	1.99e+007	5.68e+006	1.43e+007	7.29e+006	2.62e+007	1.99e+007	4.92e+006	1.59e+007	1.50e+007	2.08e+007	1.87e+007
APOA_HUMAN	16 (15)	3	671.05	3.74e-013	54.68	Apolipoprotein(a) OS=Homo sapiens GN=LPA PE=1 SV=1	1.65e+005	1.87e+006	3.39e+005	4.91e+006	2.03e+005	1.66e+005	8.00e+005	8.99e+004	1.05e+006	1.69e+005	2.16e+005	2.09e+005
APOA1_HUMAN	42 (30)	75	3925.83	5.93e-011	6.72	Apolipoprotein A-I OS=Homo sapiens GN=APOA1 PE=1 SV=1	7.33e+008	5.91e+008	1.89e+008	5.28e+008	2.63e+008	8.37e+008	5.70e+008	1.25e+008	4.49e+008	5.91e+008	6.78e+008	5.89e+008
APOA2_HUMAN	11 (10)	69	888.18	2.01e-011	4.97	Apolipoprotein A-II OS=Homo sapiens GN=APOA2 PE=1 SV=1	1.76e+008	1.56e+008	3.69e+007	9.75e+007	4.82e+007	1.83e+008	1.60e+008	4.14e+007	9.31e+007	8.97e+007	1.33e+008	1.31e+008
APOA4_HUMAN	34 (19)	65	2393.49	9.58e-014	20.14	Apolipoprotein A-IV OS=Homo sapiens GN=APOA4 PE=1 SV=3	1.15e+007	3.07e+007	2.83e+006	1.56e+007	2.79e+006	2.07e+007	1.97e+007	1.52e+006	1.76e+007	1.21e+007	1.99e+007	1.72e+007
APOB_HUMAN	262 (183)	57	1.64e+004	1.11e-016	7.64	Apolipoprotein B-100 OS=Homo sapiens GN=APOB PE=1 SV=2	1.19e+008	8.84e+007	4.68e+007	9.92e+007	1.91e+007	9.72e+007	1.46e+008	1.92e+007	1.32e+008	3.27e+007	9.90e+007	8.55e+007
APOC1_HUMAN	6 (4)	39	506.92	1.51e-013	9.94	Apolipoprotein C-I OS=Homo sapiens GN=APOC1 PE=1 SV=1	1.84e+007	1.26e+007	4.82e+006	9.67e+006	5.10e+006	1.99e+007	1.85e+007	2.00e+006	9.81e+006	1.01e+007	1.32e+007	1.11e+007
APOC2_HUMAN	5	48	259.75	4.37e-011	5.73	Apolipoprotein C-II OS=Homo sapiens GN=APOC2 PE=1 SV=1	7.12e+006	6.60e+006	3.91e+006	2.76e+006	1.24e+006	4.48e+006	5.53e+006	1.52e+006	4.67e+006	2.38e+006	4.28e+006	4.23e+006
APOC4_HUMAN	8 (6)	44	169.56	3.22e-004	9.14	Apolipoprotein C-IV OS=Homo sapiens GN=APOC4 PE=1 SV=1	3.34e+005	2.67e+005	1.19e+005	1.09e+005	1.47e+005	1.90e+005	2.90e+005	4.20e+004	3.84e+005	1.31e+005	2.02e+005	1.30e+005
APOD_HUMAN	10 (5)	39	744.36	1.51e-008	10.98	Apolipoprotein D OS=Homo sapiens GN=APOD PE=1 SV=1	9.24e+006	6.39e+006	1.68e+006	3.70e+006	1.11e+006	6.26e+006	4.98e+006	8.42e+005	6.40e+006	4.32e+006	5.84e+006	6.32e+006
APOE_HUMAN	21 (17)	66	1620.48	1.77e-011	8.12	Apolipoprotein E OS=Homo sapiens GN=APOE PE=1 SV=1	1.39e+007	1.22e+007	3.89e+006	8.14e+006	2.47e+006	1.15e+007	9.73e+006	1.72e+006	5.74e+006	7.31e+006	8.37e+006	8.20e+006
APOF_HUMAN	3	11	92.75	2.89e-007	22.50	Apolipoprotein F OS=Homo sapiens GN=APOF PE=1 SV=2	2.45e+005	3.56e+005	1.92e+004	1.31e+005	4.52e+004	1.40e+005	1.84e+005	6.22e+004	3.91e+004	1.58e+004	2.55e+005	2.13e+005
APOH_HUMAN	20 (15)	60	1392.17	4.47e-011	6.72	Beta-2-glycoprotein 1 OS=Homo sapiens GN=APOH PE=1 SV=3	3.51e+007	3.02e+007	1.14e+007	2.09e+007	1.02e+007	3.46e+007	2.84e+007	5.22e+006	2.23e+007	1.97e+007	2.24e+007	2.08e+007
APOL1_HUMAN	16 (13)	42	708.29	7.44e-010	6.19	Apolipoprotein L1 OS=Homo sapiens GN=APOL1 PE=1 SV=5	2.86e+006	1.97e+006	1.30e+006	1.97e+006	8.47e+005	1.67e+006	2.52e+006	4.63e+005	1.77e+006	1.00e+006	9.97e+005	9.10e+005
APOM_HUMAN	7 (6)	29	262.79	1.08e-010	13.70	Apolipoprotein M OS=Homo sapiens GN=APOM PE=1 SV=2	3.26e+006	3.08e+006	7.33e+005	2.29e+006	8.46e+005	4.92e+006	3.37e+006	3.59e+005	1.51e+006	2.20e+006	1.31e+006	1.34e+006
AQR_HUMAN	5 (3)	2	24.54	1.10e-011	23.96	Intron-binding protein aquarius OS=Homo sapiens GN=AQR PE=1 SV=4	2.67e+005	4.84e+005	6.37e+004	2.70e+005	6.21e+004	3.28e+005	2.53e+005	2.02e+004	4.30e+005	2.47e+005	4.30e+005	3.68e+005
ATRN_HUMAN	13 (11)	9	465.68	8.48e-009	13.35	Attractin OS=Homo sapiens GN=ATRN PE=1 SV=2	7.85e+005	5.58e+005	1.64e+005	6.48e+005	2.54e+005	6.49e+005	1.29e+006	9.69e+004	3.17e+005	4.59e+005	4.53e+005	4.46e+005
BTD_HUMAN	7 (3)	14	222.47	5.55e-003	68.98	Biotinidase OS=Homo sapiens GN=BTD PE=1 SV=2	2.83e+005	1.73e+005	1.34e+004	1.39e+005	2.04e+004	1.99e+005	1.85e+005	4104.70	1.05e+005	1.10e+005	1.07e+005	1.37e+005
C1R_HUMAN	18 (13)	26	755.15	7.98e-009	11.47	Complement C1r subcomponent OS=Homo sapiens GN=C1R PE=1 SV=2	2.76e+006	3.41e+006	4.84e+005	2.22e+006	4.61e+005	2.39e+006	2.66e+006	2.97e+005	1.63e+006	1.54e+006	1.82e+006	1.60e+006
C1S_HUMAN	17 (12)	31	867.86	9.18e-010	6.56	Complement C1s subcomponent OS=Homo sapiens GN=C1S PE=1 SV=1	2.26e+006	3.28e+006	9.85e+005	1.84e+006	9.42e+005	2.51e+006	2.65e+006	5.01e+005	1.40e+006	1.77e+006	1.44e+006	1.54e+006
C4BPA_HUMAN	20 (15)	36	926.71	8.63e-013	25.57	C4b-binding protein alpha chain OS=Homo sapiens GN=C4BPA PE=1 SV=2	6.17e+006	1.06e+007	1.62e+006	8.64e+006	1.54e+006	4.07e+006	7.42e+006	4.14e+005	2.69e+006	1.98e+006	3.26e+006	3.30e+006
CAH1_HUMAN	5 (3)	18	183.12	3.74e-009	104.23	Carbonic anhydrase 1 OS=Homo sapiens GN=CA1 PE=1 SV=2	5.04e+005	6.94e+004	2.75e+005	3.29e+004	3.40e+004	1.82e+004	1.42e+004	1.37e+004	2.90e+005	4838.96	6.74e+004	1.78e+004
CBG_HUMAN	10 (4)	29	426.24	2.22e-007	5.47	Corticosteroid-binding globulin OS=Homo sapiens GN=SERPINA6 PE=1 SV=1	1.76e+006	1.28e+006	6.09e+005	1.22e+006	5.57e+005	1.69e+006	1.75e+006	3.22e+005	1.60e+006	1.26e+006	1.30e+006	1.34e+006
CBPB2_HUMAN	7	16	251.83	1.07e-007	29.94	Carboxypeptidase B2 OS=Homo sapiens GN=CPB2 PE=1 SV=2	6.38e+005	7.00e+005	6.88e+004	4.15e+005	8.54e+004	4.78e+005	3.91e+005	2.34e+004	4.73e+005	2.91e+005	3.68e+005	3.41e+005
CBPN_HUMAN	6 (3)	16	264.50	2.13e-009	12.40	Carboxypeptidase N catalytic chain OS=Homo sapiens GN=CPN1 PE=1 SV=1	4.04e+005	4.95e+005	6.17e+004	1.03e+005	8.26e+004	5.12e+005	4.07e+005	4.13e+004	2.43e+005	2.90e+005	2.17e+005	1.76e+005
CD5L_HUMAN	16 (13)	54	870.29	1.58e-013	16.57	CD5 antigen-like OS=Homo sapiens GN=CD5L PE=1 SV=1	1.05e+007	4.02e+006	6.96e+005	7.83e+006	6.92e+005	4.02e+006	9.87e+006	6.35e+005	1.18e+006	1.51e+006	1.27e+006	1.31e+006
CENPE_HUMAN	19 (3)	7	74.73	0.00	95.81	Centromere-associated protein E OS=Homo sapiens GN=CENPE PE=1 SV=2	3.16e+005	1.87e+006	1.35e+005	4.01e+004	5.94e+005	1.30e+006	3.15e+004	2.76e+005	2.68e+004	2.48e+006	2.25e+006	2.57e+006
CENPF_HUMAN	19 (5)	7	93.59	1.84e-012	14.99	Centromere protein F OS=Homo sapiens GN=CENPF PE=1 SV=2	2.63e+006	3.27e+006	7.57e+005	1.24e+006	3.85e+005	1.40e+006	9.84e+005	2.18e+005	2.07e+006	1.13e+006	1.55e+006	1.63e+006
CERU_HUMAN	54 (44)	60	4900.17	1.30e-011	4.76	Ceruloplasmin OS=Homo sapiens GN=CP PE=1 SV=1	6.81e+007	7.92e+007	2.11e+007	5.63e+007	3.49e+007	9.77e+007	9.11e+007	2.05e+007	5.34e+007	3.93e+007	5.21e+007	5.02e+007
CFAB_HUMAN	34 (30)	50	2421.41	1.58e-014	16.43	Complement factor B OS=Homo sapiens GN=CFB PE=1 SV=2	4.57e+007	6.53e+007	1.07e+007	3.92e+007	7.24e+006	3.75e+007	4.72e+007	3.97e+006	2.81e+007	1.75e+007	2.25e+007	2.09e+007
CFAH_HUMAN	42 (31)	43	2351.49	3.11e-012	24.64	Complement factor H OS=Homo sapiens GN=CFH PE=1 SV=4	1.61e+007	3.07e+007	4.94e+006	1.71e+007	1.62e+006	1.28e+007	1.80e+007	1.24e+006	8.37e+006	2.64e+006	6.09e+006	5.88e+006
CFAI_HUMAN	16 (14)	28	624.50	1.36e-007	7.69	Complement factor I OS=Homo sapiens GN=CFI PE=1 SV=2	2.00e+006	2.54e+006	6.57e+005	2.35e+006	7.79e+005	1.74e+006	2.47e+006	3.30e+005	2.18e+006	1.68e+006	1.78e+006	1.84e+006
CHLE_HUMAN	7 (5)	9	144.74	5.32e-010	6.13	Cholinesterase OS=Homo sapiens GN=BCHE PE=1 SV=1	9.84e+005	7.14e+005	3.32e+005	5.57e+005	2.55e+005	2.88e+005	3.07e+005	1.78e+005	3.95e+005	1.61e+005	3.00e+005	2.23e+005
CLUS_HUMAN	18 (11)	36	1379.60	8.76e-010	8.93	Clusterin OS=Homo sapiens GN=CLU PE=1 SV=1	1.89e+007	1.57e+007	4.26e+006	1.15e+007	3.74e+006	1.50e+007	1.32e+007	2.12e+006	1.08e+007	8.52e+006	1.06e+007	9.95e+006
CND3_HUMAN	7 (3)	9	46.34	1.37e-013	19.56	Condensin complex subunit 3 OS=Homo sapiens GN=NCAPG PE=1 SV=1	1.15e+007	7.27e+006	1.18e+006	8.52e+006	1.17e+006	2.28e+007	1.88e+007	1.24e+006	1.14e+007	1.15e+007	1.10e+007	1.04e+007
CNDP1_HUMAN	8 (4)	18	240.32	9.43e-007	76.95	Beta-Ala-His dipeptidase OS=Homo sapiens GN=CNDP1 PE=1 SV=4	2.41e+005	1.41e+005	4.17e+004	9.88e+004	3.74e+004	1.74e+005	5.83e+005	7574.73	2.17e+005	1.04e+005	8.15e+004	7.33e+004
CO2_HUMAN	17 (11)	24	736.20	2.16e-013	14.24	Complement C2 OS=Homo sapiens GN=C2 PE=1 SV=2	1.66e+006	1.89e+006	2.96e+005	1.14e+006	2.18e+005	1.25e+006	1.34e+006	1.33e+005	1.31e+006	7.46e+005	8.70e+005	8.98e+005
CO3_HUMAN	132 (97)	81	1.14e+004	2.31e-014	5.45	Complement C3 OS=Homo sapiens GN=C3 PE=1 SV=2	4.23e+008	4.21e+008	1.34e+008	3.44e+008	1.18e+008	3.14e+008	4.21e+008	7.77e+007	3.76e+008	2.38e+008	2.93e+008	2.63e+008
CO5_HUMAN	43 (29)	26	1716.04	2.22e-016	21.38	Complement C5 OS=Homo sapiens GN=C5 PE=1 SV=4	7.44e+006	9.10e+006	1.58e+006	4.86e+006	7.86e+005	5.09e+006	6.25e+006	4.26e+005	5.00e+006	3.21e+006	4.23e+006	4.18e+006
CO6_HUMAN	24 (16)	24	1193.21	1.78e-013	22.80	Complement component C6 OS=Homo sapiens GN=C6 PE=1 SV=3	3.94e+006	5.69e+006	5.39e+005	4.49e+006	4.99e+005	3.33e+006	5.09e+006	2.49e+005	2.55e+006	2.20e+006	3.36e+006	2.91e+006
CO7_HUMAN	20 (17)	30	909.17	7.67e-011	32.89	Complement component C7 OS=Homo sapiens GN=C7 PE=1 SV=2	2.63e+007	9.50e+006	5.37e+006	7.07e+006	2.06e+006	5.01e+006	4.09e+006	8.01e+005	2.14e+007	3.89e+006	7.19e+006	3.17e+006
CO8A_HUMAN	17 (14)	28	984.09	7.55e-012	24.47	Complement component C8 alpha chain OS=Homo sapiens GN=C8A PE=1 SV=2	2.34e+006	4.68e+006	3.95e+005	3.20e+006	2.99e+005	2.78e+006	4.76e+006	1.95e+005	1.94e+006	1.24e+006	1.50e+006	1.52e+006
CO8B_HUMAN	11 (7)	24	554.11	9.23e-012	8.37	Complement component C8 beta chain OS=Homo sapiens GN=C8B PE=1 SV=3	4.19e+005	7.58e+005	2.09e+005	7.10e+005	2.12e+005	7.35e+005	1.09e+006	1.30e+005	6.46e+005	5.40e+005	5.90e+005	4.95e+005
CO9_HUMAN	19 (13)	37	849.81	4.25e-011	14.34	Complement component C9 OS=Homo sapiens GN=C9 PE=1 SV=2	3.76e+006	5.08e+006	1.12e+006	2.49e+006	5.63e+005	2.50e+006	2.08e+006	3.54e+005	1.72e+006	1.99e+006	1.84e+006	1.87e+006
CPN2_HUMAN	15 (8)	30	446.95	1.76e-009	5.61	Carboxypeptidase N subunit 2 OS=Homo sapiens GN=CPN2 PE=1 SV=3	1.10e+006	1.42e+006	3.33e+005	6.56e+005	4.82e+005	1.62e+006	1.28e+006	2.89e+005	9.31e+005	9.73e+005	9.09e+005	9.28e+005
DJC13_HUMAN	10 (3)	3	57.19	8.83e-004	1.79	DnaJ homolog subfamily C member 13 OS=Homo sapiens GN=DNAJC13 PE=1 SV=5	2.42e+006	2.08e+006	2.11e+006	2.39e+006	2.17e+006	2.99e+006	3.36e+006	1.88e+006	2.29e+006	2.01e+006	2.47e+006	2.20e+006
DSCAM_HUMAN	6 (3)	1.5	26.67	1.67e-010	26.66	Down syndrome cell adhesion molecule OS=Homo sapiens GN=DSCAM PE=1 SV=2	6.36e+005	7.32e+005	4.07e+004	2.32e+005	4.76e+004	1.01e+005	8.49e+004	2.75e+004	1.96e+005	1.02e+005	2.74e+005	2.76e+005
ECM1_HUMAN	9 (6)	17	278.74	4.34e-012	8.65	Extracellular matrix protein 1 OS=Homo sapiens GN=ECM1 PE=1 SV=2	5.61e+005	4.88e+005	7.37e+004	2.45e+005	9.34e+004	6.37e+005	3.77e+005	7.41e+004	3.51e+005	3.73e+005	3.88e+005	3.42e+005
EFCB6_HUMAN	10 (3)	7	70.29	2.19e-006	6.34	EF-hand calcium-binding domain-containing protein 6 OS=Homo sapiens GN=EFCAB6 PE=1 SV=1	4.35e+005	2.03e+005	9.27e+004	3.93e+005	2.36e+005	2.34e+005	4.96e+005	1.62e+005	4.06e+005	7.81e+004	1.71e+005	1.59e+005
F13B_HUMAN	7 (6)	12	258.81	1.44e-010	26.20	Coagulation factor XIII B chain OS=Homo sapiens GN=F13B PE=1 SV=3	3.90e+005	6.98e+005	1.06e+005	4.37e+005	8.38e+004	4.92e+005	3.95e+005	2.66e+004	2.77e+005	2.08e+005	3.31e+005	3.76e+005
FA10_HUMAN	13 (9)	23	642.07	0.00	28.12	Coagulation factor X OS=Homo sapiens GN=F10 PE=1 SV=2	1.88e+006	1.91e+006	1.42e+005	2.00e+006	1.60e+005	1.89e+006	2.22e+006	7.88e+004	1.34e+006	6.87e+005	1.47e+006	1.48e+006
FA12_HUMAN	6	14	302.46	4.77e-012	23.32	Coagulation factor XII OS=Homo sapiens GN=F12 PE=1 SV=3	7.11e+005	7.42e+005	5.04e+004	6.30e+005	6.76e+004	1.02e+006	1.03e+006	4.40e+004	5.04e+005	6.24e+005	7.87e+005	6.66e+005
FA9_HUMAN	5	13	211.89	7.32e-014	79.83	Coagulation factor IX OS=Homo sapiens GN=F9 PE=1 SV=2	8.38e+005	6.68e+005	4.09e+004	4.43e+005	3.15e+004	2.72e+005	3.43e+005	1.05e+004	3.26e+005	1.87e+005	3.61e+005	3.43e+005
FBLN1_HUMAN	4	5	141.76	1.34e-003	6.45	Fibulin-1 OS=Homo sapiens GN=FBLN1 PE=1 SV=4	9.26e+004	1.15e+005	7.93e+004	1.11e+005	5.10e+004	1.36e+005	6.70e+004	2.11e+004	1.34e+005	8.72e+004	5.97e+004	5.40e+004
FBLN3_HUMAN	3	4	51.75	4.98e-010	17.09	EGF-containing fibulin-like extracellular matrix protein 1 OS=Homo sapiens GN=EFEMP1 PE=1 SV=2	4.58e+005	4.22e+005	6.76e+005	7.52e+004	9.53e+004	1.19e+005	5.90e+004	9.76e+004	2.44e+005	3.95e+004	1.37e+005	4.05e+004
FCN3_HUMAN	4	11	182.02	1.95e-004	5.74	Ficolin-3 OS=Homo sapiens GN=FCN3 PE=1 SV=2	5.96e+005	6.35e+005	1.46e+005	3.44e+005	1.23e+005	7.06e+005	3.48e+005	2.72e+005	1.75e+005	3.49e+005	4.19e+005	4.08e+005
FETUA_HUMAN	18 (13)	43	1347.17	8.60e-012	4.94	Alpha-2-HS-glycoprotein OS=Homo sapiens GN=AHSG PE=1 SV=1	7.97e+007	8.18e+007	2.15e+007	6.76e+007	2.65e+007	6.84e+007	9.46e+007	1.92e+007	4.94e+007	3.82e+007	4.80e+007	5.45e+007
FIBA_HUMAN	53 (35)	44	4533.96	2.76e-011	14.22	Fibrinogen alpha chain OS=Homo sapiens GN=FGA PE=1 SV=2	2.94e+008	4.88e+008	1.03e+008	1.79e+008	5.72e+007	2.69e+008	1.83e+008	3.43e+007	1.59e+008	1.36e+008	1.93e+008	1.82e+008
FIBB_HUMAN	47 (40)	79	4862.36	8.11e-012	13.06	Fibrinogen beta chain OS=Homo sapiens GN=FGB PE=1 SV=2	4.75e+008	8.37e+008	1.69e+008	3.00e+008	1.13e+008	4.26e+008	3.00e+008	6.41e+007	2.17e+008	2.61e+008	3.08e+008	2.96e+008
FIBG_HUMAN	37 (24)	73	3130.94	7.31e-012	17.13	Fibrinogen gamma chain OS=Homo sapiens GN=FGG PE=1 SV=3	2.39e+008	4.19e+008	7.51e+007	1.49e+008	4.88e+007	2.45e+008	1.44e+008	2.45e+007	1.27e+008	1.41e+008	1.61e+008	1.56e+008
FINC_HUMAN	75 (59)	41	5148.58	5.89e-013	9.72	Fibronectin OS=Homo sapiens GN=FN1 PE=1 SV=4	4.11e+007	5.96e+007	9.92e+006	6.14e+006	1.40e+007	4.55e+007	1.94e+007	6.31e+006	4.73e+007	1.84e+007	2.89e+007	2.91e+007
GELS_HUMAN	21 (17)	33	1098.86	5.92e-010	6.00	Gelsolin OS=Homo sapiens GN=GSN PE=1 SV=1	7.18e+006	6.78e+006	2.00e+006	3.82e+006	1.73e+006	5.18e+006	4.82e+006	1.20e+006	5.16e+006	6.04e+006	5.35e+006	5.55e+006
GPX3_HUMAN	6 (4)	38	203.57	6.52e-007	4.78	Glutathione peroxidase 3 OS=Homo sapiens GN=GPX3 PE=1 SV=2	4.79e+005	7.63e+005	1.60e+006	4.46e+005	1.11e+006	3.77e+005	3.36e+005	5.18e+005	6.80e+005	6.02e+005	5.60e+005	5.55e+005
HABP2_HUMAN	10 (6)	21	287.23	4.32e-008	41.63	Hyaluronan-binding protein 2 OS=Homo sapiens GN=HABP2 PE=1 SV=1	3.60e+005	6.70e+005	1.81e+004	3.57e+005	2.57e+004	7.53e+005	6.56e+005	3.13e+004	4.71e+005	2.58e+005	5.09e+005	4.62e+005
HBA_HUMAN	11 (9)	91	1076.94	1.11e-016	11.95	Hemoglobin subunit alpha OS=Homo sapiens GN=HBA1 PE=1 SV=2	2.28e+007	5.93e+007	2.45e+007	1.32e+007	4.97e+006	5.06e+007	3.06e+007	1.16e+007	2.72e+007	1.08e+007	2.26e+007	2.24e+007
HBB_HUMAN	15 (8)	89	1807.11	1.65e-009	8.54	Hemoglobin subunit beta OS=Homo sapiens GN=HBB PE=1 SV=2	4.49e+007	9.48e+007	3.60e+007	2.75e+007	1.11e+007	5.41e+007	4.88e+007	2.04e+007	4.06e+007	1.78e+007	3.31e+007	3.30e+007
HBD_HUMAN	10 (3)	69	1019.37	4.41e-012	17.37	Hemoglobin subunit delta OS=Homo sapiens GN=HBD PE=1 SV=2	7.04e+005	1.41e+006	6.17e+005	4.10e+005	8.13e+004	8.54e+005	5.79e+005	1.55e+005	4.45e+005	1.50e+005	4.78e+005	4.08e+005
HEMO_HUMAN	28 (21)	60	2135.08	9.94e-009	3.26	Hemopexin OS=Homo sapiens GN=HPX PE=1 SV=2	1.17e+008	9.86e+007	3.83e+007	7.10e+007	4.10e+007	9.02e+007	9.23e+007	3.60e+007	7.34e+007	7.44e+007	8.84e+007	8.30e+007
HEP2_HUMAN	18 (11)	28	864.08	5.56e-012	13.02	Heparin cofactor 2 OS=Homo sapiens GN=SERPIND1 PE=1 SV=3	7.08e+006	7.58e+006	1.44e+006	5.05e+006	1.26e+006	5.07e+006	5.35e+006	5.82e+005	5.54e+006	2.69e+006	5.40e+006	4.55e+006
HERC2_HUMAN	14 (3)	2	73.81	4.58e-010	73.97	E3 ubiquitin-protein ligase HERC2 OS=Homo sapiens GN=HERC2 PE=1 SV=2	3.30e+005	1.62e+005	2.85e+004	1.70e+005	1.24e+004	7.95e+004	7.91e+004	4467.05	2.95e+005	3.18e+004	1.57e+005	4.87e+004
HMCN1_HUMAN	13 (3)	1	88.55	1.45e-006	19.17	Hemicentin-1 OS=Homo sapiens GN=HMCN1 PE=1 SV=2	3.40e+006	4.55e+006	6.13e+005	1.23e+006	2.95e+005	1.62e+006	1.16e+006	2.37e+005	1.01e+006	7.00e+005	8.87e+005	1.28e+006
HPT_HUMAN	32 (12)	67	3149.89	4.96e-010	11.70	Haptoglobin OS=Homo sapiens GN=HP PE=1 SV=1	1.31e+008	4.22e+008	5.88e+007	1.36e+008	6.27e+007	1.20e+008	1.18e+008	3.61e+007	1.79e+008	1.20e+008	2.19e+008	2.61e+008
HPTR_HUMAN	22 (5)	53	1836.14	4.44e-016	24.55	Haptoglobin-related protein OS=Homo sapiens GN=HPR PE=1 SV=2	1.71e+006	1.78e+006	9.09e+005	2.26e+006	4.15e+005	3.15e+006	1.75e+006	1.28e+005	1.63e+006	1.06e+006	8.37e+005	7.36e+005
HRG_HUMAN	22 (19)	41	1864.39	1.31e-014	11.12	Histidine-rich glycoprotein OS=Homo sapiens GN=HRG PE=1 SV=1	2.69e+007	3.18e+007	4.75e+006	2.08e+007	4.86e+006	2.21e+007	1.71e+007	2.86e+006	1.58e+007	5.44e+006	1.45e+007	1.27e+007
IBP3_HUMAN	4	18	249.11	4.75e-014	76.33	Insulin-like growth factor-binding protein 3 OS=Homo sapiens GN=IGFBP3 PE=1 SV=2	4.67e+005	2.25e+005	1.27e+004	1.44e+005	1.52e+004	2.99e+005	4.04e+005	6111.68	8.80e+004	6.84e+004	9.13e+004	8.85e+004
IC1_HUMAN	12 (6)	25	839.68	2.99e-011	11.99	Plasma protease C1 inhibitor OS=Homo sapiens GN=SERPING1 PE=1 SV=2	5.43e+006	4.26e+006	1.02e+006	1.20e+006	4.53e+005	3.82e+006	3.83e+006	5.16e+005	3.24e+006	2.77e+006	3.28e+006	2.96e+006
IGHA1_HUMAN	15 (6)	67	1652.68	4.12e-012	4.96	Ig alpha-1 chain C region OS=Homo sapiens GN=IGHA1 PE=1 SV=2	2.25e+008	3.13e+008	9.35e+007	4.63e+008	1.42e+008	1.52e+008	1.43e+008	1.76e+008	2.09e+008	1.02e+008	1.79e+008	2.04e+008
IGHA2_HUMAN	13 (3)	61	1403.45	4.67e-010	27.24	Ig alpha-2 chain C region OS=Homo sapiens GN=IGHA2 PE=1 SV=3	3.47e+006	1.09e+007	6.12e+005	1.66e+007	1.15e+007	4.47e+006	1.08e+007	2.96e+006	1.67e+007	8.55e+006	8.03e+006	1.03e+007
IGHD_HUMAN	4 (3)	10	116.63	0.00	659.01	Ig delta chain C region OS=Homo sapiens GN=IGHD PE=1 SV=2	3.14e+005	7.71e+005	1.17e+005	1169.91	3.42e+004	1.76e+005	4.10e+005	3315.71	3.66e+005	3227.52	1.94e+005	1.85e+005
IGHG1_HUMAN	7 (3)	31	553.22	5.66e-015	19.29	Ig gamma-1 chain C region OS=Homo sapiens GN=IGHG1 PE=1 SV=1	3.98e+006	1.84e+006	1.08e+006	1.47e+006	8.73e+005	2.30e+006	2.75e+006	2.07e+005	5.34e+005	5.09e+005	4.91e+005	4.63e+005
IGHG3_HUMAN	9 (3)	29	582.27	2.64e-014	66.79	Ig gamma-3 chain C region OS=Homo sapiens GN=IGHG3 PE=1 SV=2	1.70e+006	2.86e+006	1.44e+005	3.90e+005	2.34e+005	1.30e+006	1.88e+006	4.80e+004	3.89e+005	4.28e+004	1.69e+005	1.31e+005
IGHM_HUMAN	20 (5)	48	1850.89	1.69e-012	11.75	Ig mu chain C region OS=Homo sapiens GN=IGHM PE=1 SV=3	4.14e+007	8.58e+006	3.52e+006	2.61e+007	5.50e+006	9.74e+006	2.48e+007	5.39e+006	4.68e+006	5.96e+006	4.47e+006	4.26e+006
IGJ_HUMAN	6 (4)	37	341.39	2.20e-011	7.46	Immunoglobulin J chain OS=Homo sapiens GN=IGJ PE=1 SV=4	8.11e+006	3.66e+006	1.09e+006	7.63e+006	1.12e+006	1.91e+006	4.90e+006	1.20e+006	3.37e+006	1.57e+006	1.73e+006	2.08e+006
IGKC_HUMAN	8 (4)	88	1236.01	1.14e-008	6.87	Ig kappa chain C region OS=Homo sapiens GN=IGKC PE=1 SV=1	8.15e+007	1.10e+008	1.79e+007	1.23e+008	2.72e+007	6.24e+007	7.25e+007	2.01e+007	5.48e+007	2.58e+007	4.45e+007	4.79e+007
IGLL5_HUMAN	7 (3)	44	627.39	1.08e-010	6.80	Immunoglobulin lambda-like polypeptide 5 OS=Homo sapiens GN=IGLL5 PE=2 SV=2	5.26e+005	5.32e+005	5.93e+005	3.48e+006	1.19e+006	5.82e+005	1.80e+006	1.28e+006	1.68e+006	5.55e+005	5.11e+005	5.24e+005
ITIH1_HUMAN	24 (14)	34	1744.52	6.98e-009	4.90	Inter-alpha-trypsin inhibitor heavy chain H1 OS=Homo sapiens GN=ITIH1 PE=1 SV=3	9.30e+006	4.94e+006	2.76e+006	6.12e+006	3.09e+006	7.38e+006	5.77e+006	1.90e+006	4.94e+006	4.56e+006	6.13e+006	5.66e+006
ITIH2_HUMAN	33 (24)	35	2266.73	8.39e-011	6.37	Inter-alpha-trypsin inhibitor heavy chain H2 OS=Homo sapiens GN=ITIH2 PE=1 SV=2	2.53e+007	2.04e+007	6.53e+006	1.82e+007	7.75e+006	2.57e+007	1.84e+007	4.03e+006	1.60e+007	1.25e+007	1.92e+007	1.83e+007
ITIH3_HUMAN	13 (8)	18	570.80	1.31e-007	2.94	Inter-alpha-trypsin inhibitor heavy chain H3 OS=Homo sapiens GN=ITIH3 PE=1 SV=2	8.03e+005	7.98e+005	3.65e+005	7.13e+005	4.49e+005	1.06e+006	6.06e+005	3.61e+005	6.25e+005	5.75e+005	7.21e+005	6.79e+005
ITIH4_HUMAN	35 (24)	55	2167.75	4.26e-014	4.58	Inter-alpha-trypsin inhibitor heavy chain H4 OS=Homo sapiens GN=ITIH4 PE=1 SV=4	2.80e+007	2.30e+007	6.91e+006	1.74e+007	8.95e+006	2.18e+007	2.48e+007	6.13e+006	1.58e+007	1.40e+007	2.28e+007	2.00e+007
K1C9_HUMAN	6 (4)	12	157.51	5.48e-012	74.23	Keratin, type I cytoskeletal 9 OS=Homo sapiens GN=KRT9 PE=1 SV=3	8.68e+004	4.14e+004	6815.23	1.79e+005	1.75e+004	6.97e+004	2.63e+004	2406.55	1.33e+004	2.75e+004	5.56e+004	3.77e+004
KAIN_HUMAN	12 (8)	33	448.00	1.94e-011	13.18	Kallistatin OS=Homo sapiens GN=SERPINA4 PE=1 SV=3	8.26e+005	5.62e+005	2.01e+005	9.85e+005	2.36e+005	8.23e+005	8.16e+005	7.75e+004	1.02e+006	6.77e+005	7.79e+005	6.85e+005
KIF15_HUMAN	9 (4)	43	36.27	3.05e-010	334.46	Kinesin-like protein KIF15 OS=Homo sapiens GN=KIF15 PE=1 SV=1	7.12e+005	3.76e+005	4005.99	3.89e+005	2.96e+004	1.34e+006	9.36e+005	5.03e+004	6.29e+005	4.64e+005	6.28e+005	3.80e+005
KLKB1_HUMAN	22 (17)	9.5	1093.70	7.06e-012	12.90	Plasma kallikrein OS=Homo sapiens GN=KLKB1 PE=1 SV=1	2.02e+006	3.04e+006	5.67e+005	2.37e+006	5.12e+005	2.45e+006	2.58e+006	2.36e+005	7.84e+005	1.14e+006	1.93e+006	1.90e+006
KNG1_HUMAN	31 (23)	31	1664.84	5.85e-010	10.01	Kininogen-1 OS=Homo sapiens GN=KNG1 PE=1 SV=2	1.50e+007	1.60e+007	3.73e+006	1.82e+007	4.86e+006	2.26e+007	2.27e+007	2.27e+006	1.18e+007	1.05e+007	1.30e+007	1.30e+007
LUM_HUMAN	10 (5)	31	487.02	5.00e-012	13.80	Lumican OS=Homo sapiens GN=LUM PE=1 SV=2	2.03e+006	1.84e+006	5.07e+005	1.46e+006	3.48e+005	1.74e+006	1.30e+006	1.47e+005	1.30e+006	1.83e+006	1.11e+006	9.82e+005
LV301_HUMAN	3	34	163.17	1.12e-014	30.83	Ig lambda chain V-III region SH OS=Homo sapiens PE=1 SV=1	6.32e+005	3.90e+005	7.95e+004	2.45e+006	1.21e+005	2.27e+005	4.65e+005	1.12e+005	4.72e+005	2.93e+005	9.03e+004	8.97e+004
LV302_HUMAN	3	29	273.25	8.17e-012	12.63	Ig lambda chain V-III region LOI OS=Homo sapiens PE=1 SV=1	2.87e+006	3.26e+006	3.68e+005	4.36e+006	3.45e+005	1.61e+006	1.92e+006	5.01e+005	1.47e+006	5.65e+005	1.39e+006	1.30e+006
LYVE1_HUMAN	4	8	56.23	5.84e-012	25.29	Lymphatic vessel endothelial hyaluronic acid receptor 1 OS=Homo sapiens GN=LYVE1 PE=1 SV=2	1.75e+006	1.63e+006	2.83e+005	8.82e+005	3.17e+005	1.88e+006	2.32e+006	9.16e+004	8.30e+005	9.28e+005	1.21e+006	1.05e+006
MYH7_HUMAN	9 (4)	5	30.00	1.56e-011	10.06	Myosin-7 OS=Homo sapiens GN=MYH7 PE=1 SV=5	3.38e+005	7.90e+005	1.02e+005	3.62e+005	1.64e+005	2.26e+005	3.01e+005	7.86e+004	6.03e+005	2.22e+005	2.94e+005	2.69e+005
NEBU_HUMAN	36 (3)	6	164.63	8.02e-014	34.63	Nebulin OS=Homo sapiens GN=NEB PE=1 SV=4	2.27e+006	1.52e+006	3.07e+005	3.48e+005	1.07e+005	3.68e+006	8.43e+005	1.06e+005	2.17e+006	2.49e+005	9.91e+005	2.84e+005
PEDF_HUMAN	13 (9)	39	634.74	1.15e-010	10.37	Pigment epithelium-derived factor OS=Homo sapiens GN=SERPINF1 PE=1 SV=4	2.30e+006	2.93e+006	6.29e+005	1.33e+006	5.54e+005	1.88e+006	2.53e+006	2.83e+005	1.95e+006	9.88e+005	1.75e+006	1.47e+006
PGRP2_HUMAN	10 (9)	31	602.78	3.34e-012	9.91	N-acetylmuramoyl-L-alanine amidase OS=Homo sapiens GN=PGLYRP2 PE=1 SV=1	2.15e+006	1.59e+006	5.71e+005	1.35e+006	5.91e+005	1.23e+006	1.58e+006	2.17e+005	1.11e+006	8.62e+005	9.76e+005	9.72e+005
PHLD_HUMAN	8 (3)	8	149.60	2.64e-009	18.48	Phosphatidylinositol-glycan-specific phospholipase D OS=Homo sapiens GN=GPLD1 PE=1 SV=3	6.84e+004	7.89e+004	2.87e+004	4.46e+004	3.26e+004	1.37e+005	1.23e+005	8289.69	1.53e+005	7.60e+004	1.45e+005	1.32e+005
PLMN_HUMAN	43 (34)	60	2945.98	3.37e-010	10.10	Plasminogen OS=Homo sapiens GN=PLG PE=1 SV=2	4.91e+007	4.06e+007	8.70e+006	2.67e+007	9.66e+006	3.66e+007	4.37e+007	4.86e+006	2.98e+007	2.31e+007	2.96e+007	2.90e+007
PON1_HUMAN	12 (9)	50	720.25	1.86e-008	2.74	Serum paraoxonase/arylesterase 1 OS=Homo sapiens GN=PON1 PE=1 SV=3	2.92e+006	1.83e+006	1.89e+006	3.67e+006	2.45e+006	3.85e+006	3.75e+006	1.40e+006	3.61e+006	3.06e+006	3.31e+006	2.92e+006
PROS_HUMAN	9 (6)	15	526.23	1.08e-014	55.30	Vitamin K-dependent protein S OS=Homo sapiens GN=PROS1 PE=1 SV=1	1.32e+006	2.15e+006	2.19e+005	1.44e+006	9.32e+004	1.17e+006	1.59e+006	3.88e+004	7.92e+005	4.22e+005	1.02e+006	9.20e+005
PZP_HUMAN	21 (6)	15	988.94	2.36e-010	17.91	Pregnancy zone protein OS=Homo sapiens GN=PZP PE=1 SV=4	6.72e+005	5.38e+005	1.41e+005	6.15e+005	1.13e+005	1.61e+005	2.82e+005	3.75e+004	1.94e+005	1.42e+005	4.63e+005	5.00e+005
RET4_HUMAN	11 (7)	58	602.93	4.70e-010	4.94	Retinol-binding protein 4 OS=Homo sapiens GN=RBP4 PE=1 SV=3	2.07e+006	2.59e+006	1.63e+006	1.77e+006	1.73e+006	4.50e+006	5.27e+006	1.07e+006	3.15e+006	2.23e+006	3.19e+006	3.09e+006
RM19_HUMAN	5 (3)	9	23.33	1.10e-012	26.78	39S ribosomal protein L19, mitochondrial OS=Homo sapiens GN=MRPL19 PE=1 SV=2	7.08e+006	8.26e+006	1.72e+006	1.43e+006	9.52e+005	1.68e+006	1.54e+006	3.08e+005	3.00e+006	1.64e+006	3.10e+006	2.01e+006
SAA1_HUMAN	5 (3)	52	316.04	3.33e-016	20.49	Serum amyloid A-1 protein OS=Homo sapiens GN=SAA1 PE=1 SV=1	6.58e+005	9.19e+005	3.63e+005	3.07e+005	3.55e+005	2.66e+005	3.57e+005	1.78e+005	4.65e+005	5.60e+005	3.64e+006	2.87e+006
SAA4_HUMAN	7 (6)	52	449.55	2.58e-008	14.08	Serum amyloid A-4 protein OS=Homo sapiens GN=SAA4 PE=1 SV=2	1.72e+007	1.95e+007	3.34e+006	9.88e+006	2.39e+006	9.89e+006	9.72e+006	1.39e+006	7.45e+006	5.36e+006	7.25e+006	8.74e+006
SAMP_HUMAN	4	16	223.24	5.61e-012	44.52	Serum amyloid P-component OS=Homo sapiens GN=APCS PE=1 SV=2	8.63e+004	6.15e+005	8.74e+004	1.50e+004	3.37e+004	1.19e+005	2.63e+005	1.38e+004	3.35e+005	1.12e+005	1.71e+005	1.35e+005
SHBG_HUMAN	6 (4)	14	128.08	3.00e-006	3.59	Sex hormone-binding globulin OS=Homo sapiens GN=SHBG PE=1 SV=2	7.54e+004	9.97e+004	3.35e+004	4.58e+004	4.66e+004	1.10e+005	1.14e+005	3.18e+004	3.64e+004	8.46e+004	9.97e+004	8.70e+004
SYCP2_HUMAN	11 (3)	8	64.38	7.86e-012	8.96	Synaptonemal complex protein 2 OS=Homo sapiens GN=SYCP2 PE=2 SV=2	3.35e+006	1.83e+006	6.27e+005	3.84e+006	5.65e+005	1.08e+006	1.01e+006	4.28e+005	2.85e+006	8.30e+005	1.82e+006	1.16e+006
TETN_HUMAN	6 (3)	30	72.10	3.45e-009	19.16	Tetranectin OS=Homo sapiens GN=CLEC3B PE=1 SV=3	1.08e+005	1.04e+005	3.47e+004	1.52e+005	2.70e+004	1.44e+005	1.44e+005	7936.96	7.65e+004	1.23e+005	1.14e+005	1.04e+005
THBG_HUMAN	8 (6)	17	282.53	4.41e-008	8.12	Thyroxine-binding globulin OS=Homo sapiens GN=SERPINA7 PE=1 SV=2	1.14e+006	8.47e+005	3.22e+005	6.50e+005	3.13e+005	7.07e+005	4.66e+005	1.40e+005	4.91e+005	6.33e+005	5.04e+005	4.39e+005
THRB_HUMAN	29 (23)	51	2320.07	2.37e-010	6.36	Prothrombin OS=Homo sapiens GN=F2 PE=1 SV=2	2.97e+007	3.02e+007	6.68e+006	1.69e+007	7.45e+006	2.87e+007	2.95e+007	4.75e+006	1.65e+007	1.80e+007	2.37e+007	2.36e+007
TITIN_HUMAN	81 (10)	2	292.55	3.70e-014	22.27	Titin OS=Homo sapiens GN=TTN PE=1 SV=4	1.06e+007	9.15e+006	1.91e+006	5.70e+006	1.32e+006	5.42e+006	9.06e+006	4.77e+005	6.48e+006	3.43e+006	4.69e+006	4.09e+006
TRFE_HUMAN	80 (64)	80	7445.56	5.49e-012	8.25	Serotransferrin OS=Homo sapiens GN=TF PE=1 SV=3	1.28e+009	7.92e+008	2.61e+008	7.02e+008	3.06e+008	7.10e+008	1.00e+009	1.55e+008	1.08e+009	6.57e+008	7.08e+008	7.09e+008
TTHY_HUMAN	11 (9)	69	1275.27	6.68e-008	4.80	Transthyretin OS=Homo sapiens GN=TTR PE=1 SV=1	2.46e+007	3.52e+007	1.07e+007	1.24e+007	1.33e+007	2.27e+007	2.44e+007	7.33e+006	2.68e+007	1.92e+007	2.31e+007	2.55e+007
UBP7_HUMAN	8 (4)	8	22.46	2.81e-013	58.41	Ubiquitin carboxyl-terminal hydrolase 7 OS=Homo sapiens GN=USP7 PE=1 SV=2	4.97e+006	1.50e+006	3.12e+005	2.54e+006	1.83e+005	3.61e+006	4.09e+005	8.51e+004	4.10e+006	5.18e+005	5.30e+005	6.03e+005
VTDB_HUMAN	34 (27)	75	2626.12	8.88e-016	7.75	Vitamin D-binding protein OS=Homo sapiens GN=GC PE=1 SV=1	1.11e+008	1.43e+008	2.58e+007	1.03e+008	2.68e+007	1.65e+008	1.45e+008	2.13e+007	7.72e+007	7.17e+007	8.82e+007	8.83e+007
VTNC_HUMAN	13 (11)	30	1057.87	5.27e-009	5.68	Vitronectin OS=Homo sapiens GN=VTN PE=1 SV=1	3.24e+007	2.52e+007	9.93e+006	2.11e+007	1.07e+007	2.55e+007	3.18e+007	5.70e+006	2.41e+007	1.84e+007	1.90e+007	1.85e+007
ZA2G_HUMAN	17 (12)	54	1223.55	2.09e-011	6.50	Zinc-alpha-2-glycoprotein OS=Homo sapiens GN=AZGP1 PE=1 SV=2	1.46e+007	1.55e+007	3.61e+006	3.77e+006	3.62e+006	1.39e+007	1.16e+007	2.38e+006	9.97e+006	8.78e+006	1.25e+007	1.14e+007
